# Supplementary material for: Pubertal timing and breast cancer risk in the Sister Study cohort
Source: PubMed Central journal article supplement (PMC7590599; doi:10.1186/s13058-020-01326-2), 2020-10-27
Supplement: 13058_2020_1326_MOESM3_ESM.pdf [file 13058_2020_1326_MOESM3_ESM.pdf]

**Table S2.** Hazard ratios (HRs) and 95% confidence intervals (CIs) for the association between age at thelarche and incident breast cancer in the Sister Study cohort stratified by characteristics associated with age at thelarche

|                                                 | Age at thelarche |      |            |             |      |            |             |    |          |           |      |            | Continuous         |                  |            |                    |
|-------------------------------------------------|------------------|------|------------|-------------|------|------------|-------------|----|----------|-----------|------|------------|--------------------|------------------|------------|--------------------|
|                                                 | <10 years        |      |            | 10-11 years |      |            | 12-13 years |    |          | >13 years |      |            | P-het <sup>a</sup> | Per 1-year later |            | P-het <sup>b</sup> |
|                                                 | N cases          | HR   | 95% CI     | N cases     | HR   | 95% CI     | N cases     | HR | 95% CI   | N cases   | HR   | 95% CI     |                    | HR               | 95% CI     |                    |
| Birth cohort <sup>c</sup>                       |                  |      |            |             |      |            |             |    |          |           |      |            | 0.64               |                  |            | 0.52               |
| 1928-1939                                       | 16               | 1.42 | 0.85, 2.35 | 109         | 0.87 | 0.70, 1.09 | 282         | 1  | Referent | 79        | 0.85 | 0.66, 1.10 |                    | 0.99             | 0.93, 1.05 |                    |
| 1940-1949                                       | 41               | 1.04 | 0.76, 1.43 | 364         | 1.09 | 0.96, 1.24 | 641         | 1  | Referent | 180       | 0.92 | 0.78, 1.09 |                    | 0.98             | 0.94, 1.01 |                    |
| 1950-1959                                       | 50               | 1.42 | 1.06, 1.89 | 315         | 1.07 | 0.93, 1.23 | 564         | 1  | Referent | 171       | 0.91 | 0.77, 1.09 |                    | 0.95             | 0.91, 0.98 |                    |
| 1960-1974                                       | 28               | 1.19 | 0.80, 1.76 | 133         | 0.93 | 0.75, 1.14 | 238         | 1  | Referent | 84        | 0.88 | 0.69, 1.14 |                    | 0.98             | 0.93, 1.04 |                    |
| Race/ethnicity <sup>d</sup>                     |                  |      |            |             |      |            |             |    |          |           |      |            | 0.64               |                  |            | 0.63               |
| Non-Hispanic white                              | 105              | 1.26 | 1.03, 1.53 | 772         | 1.00 | 0.92, 1.09 | 1517        | 1  | Referent | 438       | 0.91 | 0.82, 1.01 |                    | 0.98             | 0.95, 1.00 |                    |
| Non-Hispanic black                              | 16               | 1.04 | 0.62, 1.76 | 78          | 1.17 | 0.87, 1.57 | 111         | 1  | Referent | 45        | 0.94 | 0.67, 1.34 |                    | 0.95             | 0.89, 1.02 |                    |
| Hispanic                                        | 10               | 1.46 | 0.74, 2.88 | 38          | 1.11 | 0.72, 1.69 | 54          | 1  | Referent | 19        | 0.93 | 0.55, 1.58 |                    | 0.97             | 0.87, 1.09 |                    |
| Other                                           | 4                | 1.16 | 0.41, 3.27 | 33          | 1.39 | 0.88, 2.21 | 43          | 1  | Referent | 12        | 0.63 | 0.33, 1.21 |                    | 0.91             | 0.80, 1.03 |                    |
| Weight relative to peers at age 10 <sup>e</sup> |                  |      |            |             |      |            |             |    |          |           |      |            | 0.79               |                  |            | 0.82               |
| Same weight or lighter                          | 81               | 1.26 | 1.01, 1.58 | 712         | 1.05 | 0.96, 1.15 | 1521        | 1  | Referent | 478       | 0.88 | 0.79, 0.98 |                    | 0.96             | 0.94, 0.98 |                    |
| Heavier                                         | 54               | 1.43 | 1.05, 1.93 | 208         | 1.09 | 0.89, 1.32 | 201         | 1  | Referent | 36        | 1.01 | 0.70, 1.45 |                    | 0.95             | 0.90, 1.01 |                    |
| Height relative to peers at age 10 <sup>e</sup> |                  |      |            |             |      |            |             |    |          |           |      |            | 0.62               |                  |            | 0.57               |
| Same height or shorter                          | 74               | 1.27 | 1.00, 1.61 | 588         | 1.05 | 0.95, 1.15 | 1213        | 1  | Referent | 380       | 0.93 | 0.83, 1.04 |                    | 0.97             | 0.94, 1.00 |                    |
| Taller                                          | 61               | 1.10 | 0.84, 1.44 | 333         | 0.95 | 0.83, 1.09 | 510         | 1  | Referent | 134       | 0.85 | 0.70, 1.03 |                    | 0.98             | 0.95, 1.02 |                    |

No violations of proportional hazards assumption for any of the exposures of interest.

<sup>a</sup>P for heterogeneity from joint Wald test using fully adjusted Cox model

<sup>b</sup>P for heterogeneity from Wald or joint Wald test using fully adjusted Cox model

<sup>c</sup>Adjusted for attained age, race/ethnicity and family income level growing up

<sup>d</sup>Adjusted for attained age and family income level growing up and stratified by birth cohort

<sup>e</sup>Adjusted for attained age, race/ethnicity and family income level growing up and stratified by birth cohort
