# Supplementary material for: Pubertal timing and breast cancer risk in the Sister Study cohort
Source: PubMed Central journal article supplement (PMC7590599; doi:10.1186/s13058-020-01326-2), 2020-10-27
Supplement: 13058_2020_1326_MOESM6_ESM.pdf [file 13058_2020_1326_MOESM6_ESM.pdf]

**Table S5.** Hazard ratios (HRs) and 95% confidence intervals (CIs) for the associations between pubertal timing and tempo and incident breast cancer in the Sister Study cohort using the same categories as in the Generations Study (Bodicoat et al, 2014)

|                                           | Person-<br>years | N<br>cases | Minimally<br>adjusted <sup>a</sup> |            | Fully adjusted <sup>b</sup> |            |  |
|-------------------------------------------|------------------|------------|------------------------------------|------------|-----------------------------|------------|--|
|                                           |                  |            | HR                                 | 95% CI     | HR                          | 95% CI     |  |
| <i>Age at pubertal milestone</i>          |                  |            |                                    |            |                             |            |  |
| <i>Age at thelarche</i>                   |                  |            |                                    |            |                             |            |  |
| ≤10 years                                 | 61,777           | 454        | 1.02                               | 0.92, 1.13 | 1.02                        | 0.92, 1.13 |  |
| 11-12 years                               | 220,129          | 1623       | 1.00                               | Referent   | 1.00                        | Referent   |  |
| ≥13 years                                 | 177,819          | 1218       | 0.93                               | 0.86, 1.00 | 0.93                        | 0.86, 1.00 |  |
| HR for trend <sup>c</sup>                 | 459,726          | 3295       | 0.95                               | 0.90, 1.00 | 0.95                        | 0.90, 1.00 |  |
| <i>Age at menarche</i>                    |                  |            |                                    |            |                             |            |  |
| ≤12 years                                 | 218,141          | 1639       | 1.07                               | 1.00, 1.15 | 1.08                        | 1.00, 1.16 |  |
| 13-14 years                               | 196,181          | 1369       | 1.00                               | Referent   | 1.00                        | Referent   |  |
| ≥15 years                                 | 45,403           | 287        | 0.91                               | 0.81, 1.04 | 0.92                        | 0.81, 1.04 |  |
| HR for trend <sup>c</sup>                 | 459,726          | 3295       | 0.93                               | 0.88, 0.98 | 0.93                        | 0.88, 0.98 |  |
| <i>Age reached adult height</i>           |                  |            |                                    |            |                             |            |  |
| ≤14 years                                 | 116,762          | 878        | 0.97                               | 0.89, 1.06 | 0.97                        | 0.89, 1.06 |  |
| 15-16 years                               | 133,583          | 1006       | 1.00                               | Referent   | 1.00                        | Referent   |  |
| ≥17 years                                 | 209,381          | 1411       | 0.91                               | 0.84, 0.98 | 0.91                        | 0.84, 0.98 |  |
| HR for trend <sup>c</sup>                 | 459,726          | 3295       | 0.96                               | 0.92, 1.00 | 0.96                        | 0.92, 1.00 |  |
| <i>Pubertal tempo</i>                     |                  |            |                                    |            |                             |            |  |
| <i>Time from thelarche to menarche</i>    |                  |            |                                    |            |                             |            |  |
| <0 years                                  | 81,423           | 592        | 1.01                               | 0.92, 1.11 | 1.01                        | 0.92, 1.11 |  |
| 0 years                                   | 169,355          | 1239       | 1.00                               | Referent   | 1.00                        | Referent   |  |
| 1 year                                    | 130,298          | 913        | 0.97                               | 0.89, 1.05 | 0.96                        | 0.89, 1.05 |  |
| ≥2 years                                  | 78,650           | 551        | 0.99                               | 0.90, 1.10 | 1.00                        | 0.90, 1.10 |  |
| HR for trend <sup>c</sup>                 | 459,726          | 3295       | 0.99                               | 0.96, 1.03 | 0.99                        | 0.96, 1.03 |  |
| <i>Time from menarche to adult height</i> |                  |            |                                    |            |                             |            |  |
| <0 years                                  | 10,239           | 76         | 1.01                               | 0.79, 1.28 | 1.01                        | 0.79, 1.28 |  |
| 0-1 years                                 | 85,211           | 626        | 1.00                               | Referent   | 1.00                        | Referent   |  |
| 2-3 years                                 | 137,145          | 973        | 0.99                               | 0.90, 1.10 | 0.99                        | 0.90, 1.10 |  |
| ≥4 years                                  | 227,131          | 1620       | 1.01                               | 0.92, 1.11 | 1.01                        | 0.92, 1.11 |  |
| HR for trend <sup>c</sup>                 | 459,726          | 3295       | 1.00                               | 0.96, 1.05 | 1.01                        | 0.97, 1.05 |  |

N=49,686 women included in each model. No violations of proportional hazards assumption for any of the exposures of interest.

<sup>a</sup>Adjusted for attained age and stratified by birth cohort

<sup>b</sup>Additionally adjusted for race/ethnicity and family income level growing up

<sup>c</sup>HR for trend corresponds to a one-category increase in exposure, modelled as an ordinal variable
