# Supplementary material for: Pubertal timing and breast cancer risk in the Sister Study cohort
Source: Springer Nature journal article supplement (doi:10.1186/s13058-020-01326-2), 2020-10-27

**Figure S1.** Flow chart of eligible study population.

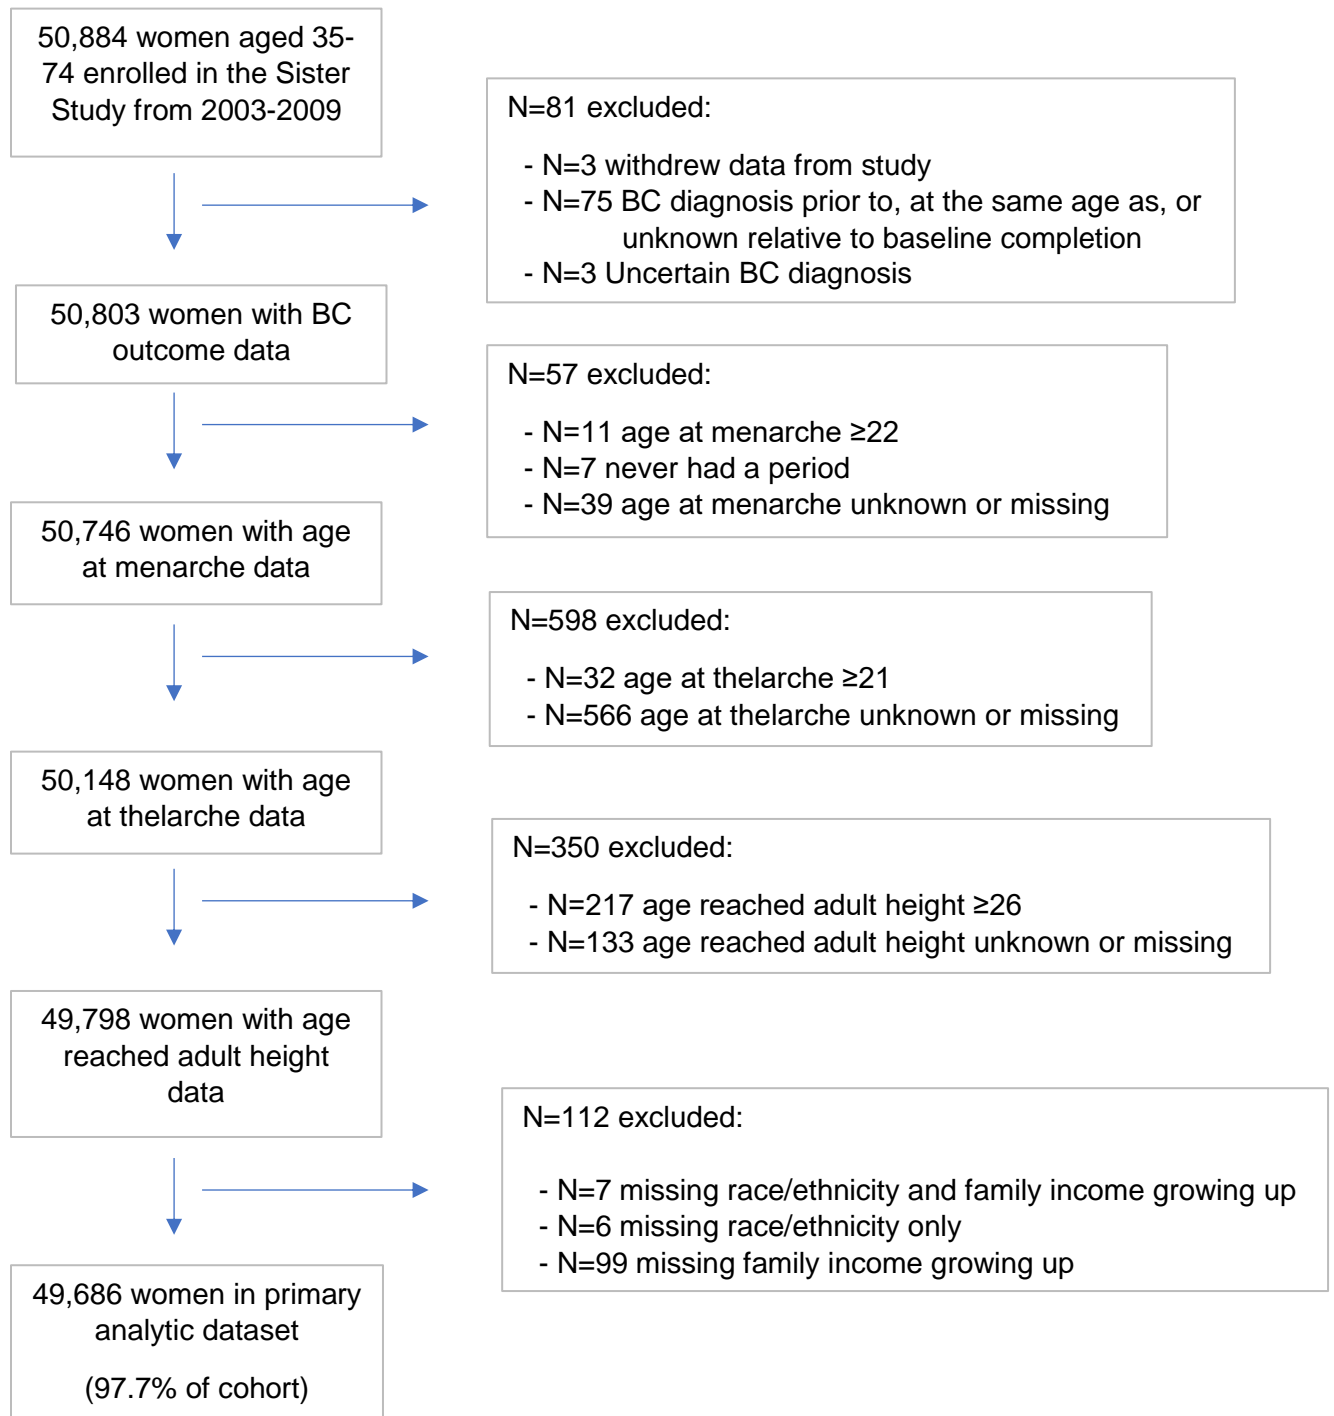

Supplement: MOESM1 [file 18526210]
