# Supplementary material for: Pubertal timing and breast cancer risk in the Sister Study cohort
Source: Springer Nature journal article supplement (doi:10.1186/s13058-020-01326-2), 2020-10-27
Supplement: MOESM2 [file 18526210]

**Table S1.** Spearman correlations between pubertal variables

|                                    | Age at thelarche | Age at menarche | Age reached adult height | Time from thelarche to menarche |
|------------------------------------|------------------|-----------------|--------------------------|---------------------------------|
| Age at menarche                    | 0.62             |                 |                          |                                 |
| Age reached adult height           | 0.26             | 0.28            |                          |                                 |
| Time from thelarche to menarche    | -0.44            | 0.36            | 0.01                     |                                 |
| Time from menarche to adult height | -0.11            | -0.31           | 0.79                     | -0.21                           |

*All correlations coefficients significant at  $p < .0001$  except correlation between age reached adult height and time between thelarche and menarche*
