# Supplementary material for: Pubertal timing and breast cancer risk in the Sister Study cohort
Source: Springer Nature journal article supplement (doi:10.1186/s13058-020-01326-2), 2020-10-27
Supplement: MOESM4 [file 18526210]

**Table S3.** Hazard ratios (HRs) and 95% confidence intervals (CIs) for the association between age at thelarche and incident breast cancer in the Sister Study cohort by breast cancer characteristics

|                                              | Age at thelarche |      |            |             |      |            |             |    |          |           |      |            | Continuous |                  |            |
|----------------------------------------------|------------------|------|------------|-------------|------|------------|-------------|----|----------|-----------|------|------------|------------|------------------|------------|
|                                              | <10 years        |      |            | 10-11 years |      |            | 12-13 years |    |          | >13 years |      |            | P-het      | Per 1-year later | P-het      |
|                                              | N cases          | HR   | 95% CI     | N cases     | HR   | 95% CI     | N cases     | HR | 95% CI   | N cases   | HR   | 95% CI     |            |                  |            |
| Tumor invasiveness <sup>a,b</sup>            |                  |      |            |             |      |            |             |    |          |           |      |            | 0.52       |                  | 0.26       |
| Invasive                                     | 112              | 1.32 | 1.08, 1.60 | 717         | 1.03 | 0.94, 1.12 | 1345        | 1  | Referent | 398       | 0.90 | 0.80, 1.01 |            | 0.96             | 0.94, 0.99 |
| DCIS                                         | 23               | 0.93 | 0.61, 1.42 | 204         | 1.02 | 0.86, 1.21 | 380         | 1  | Referent | 116       | 0.92 | 0.75, 1.14 |            | 0.99             | 0.95, 1.04 |
| Estrogen receptor (ER) status <sup>a,b</sup> |                  |      |            |             |      |            |             |    |          |           |      |            | 0.95       |                  | 0.55       |
| ER+                                          | 93               | 1.15 | 0.94, 1.43 | 667         | 0.99 | 0.90, 1.09 | 1299        | 1  | Referent | 365       | 0.86 | 0.77, 0.97 |            | 0.97             | 0.95, 1.00 |
| ER-                                          | 20               | 1.32 | 0.83, 2.08 | 117         | 0.96 | 0.77, 1.20 | 233         | 1  | Referent | 66        | 0.85 | 0.65, 1.12 |            | 0.95             | 0.90, 1.01 |
| Menopausal status <sup>c,d</sup>             |                  |      |            |             |      |            |             |    |          |           |      |            | 0.29       |                  | 0.10       |
| Pre-menopausal                               | 24               | 0.94 | 0.62, 1.42 | 156         | 0.91 | 0.75, 1.11 | 308         | 1  | Referent | 98        | 0.83 | 0.66, 1.04 |            | 1.00             | 0.96, 1.05 |
| Post-menopausal <sup>e</sup>                 | 111              | 1.32 | 1.09, 1.60 | 765         | 1.06 | 0.97, 1.15 | 1417        | 1  | Referent | 416       | 0.92 | 0.83, 1.03 |            | 0.96             | 0.94, 0.98 |

<sup>a</sup>Joint Cox model adjusted for attained age, race/ethnicity and family income level growing up and stratified by birth cohort and subtype

<sup>b</sup>P for heterogeneity from joint Wald test for categorical exposure or Wald test for continuous exposure from a fully adjusted joint Cox proportional hazards model

<sup>c</sup>Adjusted for attained age, race/ethnicity and family income level growing up and stratified by birth cohort

<sup>d</sup>P for heterogeneity from joint Wald test for categorical exposure or Wald test for continuous exposure using fully adjusted Cox model

<sup>e</sup>Proportional hazards assumption violated for continuous age at thelarche exposure in strata of post-menopausal women
