# Supplementary material for: Pubertal timing and breast cancer risk in the Sister Study cohort
Source: Springer Nature journal article supplement (doi:10.1186/s13058-020-01326-2), 2020-10-27
Supplement: MOESM5 [file 18526210]

**Table S4.** Sensitivity analyses for the association between age at thelarche and incident breast cancer in the Sister Study cohort

| Analysis                                                                                                             | N in model | Person-years | Age at thelarche <sup>a</sup> |      |            |             |      |            |             |    |          |           |      |            | Continuous (per 1-year later) |            |
|----------------------------------------------------------------------------------------------------------------------|------------|--------------|-------------------------------|------|------------|-------------|------|------------|-------------|----|----------|-----------|------|------------|-------------------------------|------------|
|                                                                                                                      |            |              | <10 years                     |      |            | 10-11 years |      |            | 12-13 years |    |          | >13 years |      |            | HR                            | 95% CI     |
|                                                                                                                      |            |              | N cases                       | HR   | 95% CI     | N cases     | HR   | 95% CI     | N cases     | HR | 95% CI   | N cases   | HR   | 95% CI     |                               |            |
| Full cohort                                                                                                          | 49,686     | 459,726      | 135                           | 1.23 | 1.03, 1.46 | 921         | 1.03 | 0.95, 1.11 | 1725        | 1  | Referent | 514       | 0.91 | 0.82, 1.00 | 0.97                          | 0.95, 0.99 |
| <i>Adjusting age at thelarche:</i>                                                                                   |            |              |                               |      |            |             |      |            |             |    |          |           |      |            |                               |            |
| Assuming age at thelarche occurred one year earlier than reported for women with thelarche-menarche tempo ≤0 years   | 49,686     | 459,726      | 227                           | 1.18 | 1.02, 1.36 | 1388        | 1.11 | 1.03, 1.20 | 1380        | 1  | Referent | 300       | 1.00 | 0.88, 1.13 | 0.96                          | 0.94, 0.99 |
| Assuming age at thelarche occurred two years earlier than reported for women with thelarche-menarche tempo ≤0 years  | 49,686     | 459,726      | 482                           | 1.19 | 1.07, 1.33 | 1626        | 1.07 | 0.99, 1.16 | 997         | 1  | Referent | 190       | 0.94 | 0.80, 1.09 | 0.96                          | 0.94, 0.99 |
| <i>Restricting study population:</i>                                                                                 |            |              |                               |      |            |             |      |            |             |    |          |           |      |            |                               |            |
| Excluding women age ≥60 years at baseline                                                                            | 33,506     | 314,210      | 93                            | 1.30 | 1.05, 1.61 | 581         | 1.05 | 0.95, 1.16 | 1028        | 1  | Referent | 324       | 0.93 | 0.82, 1.06 | 0.96                          | 0.94, 0.99 |
| Excluding women with thelarche-menarche tempo below 5th percentile (-2 years) or above the 95th percentile (3 years) | 47,762     | 442,344      | 116                           | 1.21 | 1.00, 1.46 | 900         | 1.02 | 0.94, 1.11 | 1705        | 1  | Referent | 464       | 0.90 | 0.81, 1.00 | 0.97                          | 0.95, 0.99 |
| Excluding women with thelarche-menarche tempo <0 years or >4 years                                                   | 40,547     | 375,929      | 127                           | 1.23 | 1.03, 1.48 | 849         | 1.02 | 0.94, 1.11 | 1437        | 1  | Referent | 271       | 0.88 | 0.77, 1.00 | 0.97                          | 0.94, 1.00 |

|                                                                                                            |        |         |     |      |            |     |      |            |     |   |          |     |      |            |      |            |
|------------------------------------------------------------------------------------------------------------|--------|---------|-----|------|------------|-----|------|------------|-----|---|----------|-----|------|------------|------|------------|
| Excluding women with thelarche-menarche tempo $\leq 0$ years (thelarche at the same age or after menarche) | 22,476 | 208,948 | 109 | 1.31 | 1.07, 1.60 | 574 | 1.03 | 0.92, 1.15 | 673 | 1 | Referent | 108 | 0.95 | 0.77, 1.16 | 0.97 | 0.93, 1.01 |
|------------------------------------------------------------------------------------------------------------|--------|---------|-----|------|------------|-----|------|------------|-----|---|----------|-----|------|------------|------|------------|

No violations of proportional hazards assumption for any of the exposures of interest.

<sup>a</sup>Adjusted for attained age as the underlying time scale, race/ethnicity and family income level growing up and stratified by birth cohort
